# Supplementary material for: Long-Term Effects of Microfiltered Seawater and Resistance Training with Elastic Bands on Hepatic Parameters, Inflammation, Oxidative Stress, and Blood Pressure of Older Women: A 32-Week, Double-Blinded, Randomized, Placebo-Controlled Trial
Source: MDPI journal article supplement (doi:10.3390/healthcare12020204), 2024-01-15
Supplement: s1 [file s1]

# PRESENT 2020 (PROPER REPORTING OF EVIDENCE IN SPORT AND EXERCISE NUTRITION TRIALS) CHECKLIST <sup>a</sup>

| Section                           | Item | Checklist                                                                                                                              | Page/Line Number<br>(if applicable)                          |
|-----------------------------------|------|----------------------------------------------------------------------------------------------------------------------------------------|--------------------------------------------------------------|
| <b>Title</b>                      | 1a   | State the independent (groups/conditions) and dependent (outcome) variables                                                            | Page 0, lines 1–2                                            |
|                                   | 1b   | Identify the study population or case                                                                                                  | Page 0, lines 3–4                                            |
| <b>Abstract</b>                   | 2a   | Specify the research design, methods, and characteristics of the study population                                                      | Page 0, lines 11–13                                          |
|                                   | 2b   | Report a balanced account of the results and cite actual data                                                                          | Page 0, lines 13–20                                          |
|                                   | 2c   | Restrict conclusions to measured variables, without speculation or unsupported recommendations                                         | Page 0, lines 20–23                                          |
| <b>Introduction</b>               | 3a   | Present a scientific rationale based on an objective review of available evidence                                                      | Pages 1–2, lines 27–63                                       |
|                                   | 3b   | State the aims, objectives, research questions, and/or hypotheses                                                                      | Pages 2–3, lines 64–74                                       |
| <b>Methods</b>                    |      |                                                                                                                                        |                                                              |
| <i>Ethics</i>                     | 4    | Provide details of ethical approval (citing conduct of human research in accordance with the Declaration of Helsinki)                  | Page 3, lines 80–86                                          |
| <i>Design</i>                     | 5    | Summarize the research design (e.g., parallel trial/cross-over, randomized, counterbalanced, blinding, or observational)               | Page 3, lines 78–80                                          |
| <i>Sampling</i>                   | 6a   | List the eligibility (inclusion/exclusion) criteria and sampling method                                                                | Page 4, lines 96–102, 112–114                                |
|                                   | 6b   | Characterize the study sample (e.g., demographics, anthropometry, and lifestyle)                                                       | Page 9, lines 208–217, Table 1                               |
|                                   | 6c   | Report the setting/location and periods of recruitment and data collection                                                             | Acknowledgements Section                                     |
|                                   | 6d   | Justify the sample size (presenting the selected target effect size and error variances to replicate sample size estimates)            | Pages 7–8, lines 184–188                                     |
| <i>Interventions</i> <sup>b</sup> | 7    | Detail all aspects of the groups/conditions (considering the need to verify the composition of ingested substances)                    | Pages 5–6, lines 117–148                                     |
| <i>Measurements</i>               | 8a   | Define the pre-specified primary, secondary and/or mechanistic outcome variables                                                       | Pages 6–7, lines 151–181                                     |
|                                   | 8b   | Rationalize the selection of test protocols, considering validity and reliability (e.g., coefficient of variation, familiarization)    | Page 7, lines 166–169                                        |
|                                   | 8c   | Justify the smallest worthwhile effect or minimal clinically important difference                                                      | Page 7, lines 170–173 and 180–181                            |
| <i>Randomization</i>              | 9    | Detail the exact mechanisms of generating and concealing the random allocation sequence                                                | Page 4, lines 112–114                                        |
| <i>Blinding</i> <sup>b</sup>      | 10   | Document whether participants and/or researchers were aware of allocation (e.g., exit questionnaire)                                   | Page 3, lines 90–91; Page 4 112–114<br>Page 6, lines 145–148 |
| <i>Standardization</i>            | 11   | Describe within- and between-participant controls (e.g., replication/reporting of diet, physical activity, sleep, and menstrual cycle) | Page 3, lines 87–89                                          |
| <i>Order Effects</i>              | 12   | Detail control of systematic influences of serial measurements (e.g., sequence effect in analysis model, wash-out interval)            | Pages 3, lines 90–93                                         |

(continued)

| Section           | Item | Checklist                                                                                                                                  | Page/Line Number<br>(if applicable)     |
|-------------------|------|--------------------------------------------------------------------------------------------------------------------------------------------|-----------------------------------------|
| <i>Statistics</i> | 13a  | Specify the contrast for primary inferences (i.e., relative to the appropriate control, not changes from baseline in each group/condition) | Pages 9–10, lines 221–245<br>Tables 2–4 |
|                   | 13b  | Clearly distinguish and fully justify any unplanned, interim, or exploratory subgroup analyses                                             | N/A                                     |
|                   | 13c  | Describe any adjustments for violated statistical assumptions and for relevant covariates (e.g., baseline measures)                        | N/A                                     |
| <b>Results</b>    | 14a  | Report the sample size at each phase from recruitment to analysis (with reasons for losses and exclusions)                                 | Page 9, lines 208–217<br>Figure 1       |
|                   | 14b  | Ensure data analysis matches research design, avoiding data pooling across groups/conditions (i.e., pseudoreplication)                     | Pages 9–10                              |
|                   | 15a  | Report SI units and report measures of central tendency, variability, and effect size/precision (confidence intervals)                     | Pages 9–10                              |
|                   | 15b  | Report individual data/responses (e.g., draw figures showing the raw data in each group/condition)                                         | Figure 2                                |
|                   | 15c  | Document all relevant harms and unintended consequences observed                                                                           | Page 9, lines 212–213                   |
| <b>Discussion</b> | 16a  | Present an objective and balanced interpretation of the observed data within the context of existing evidence                              | Pages 11–15                             |
|                   | 16b  | Consider the applicability and/or practical relevance of the research findings (e.g., external validity)                                   | Page 15, lines 362–368                  |
|                   | 16c  | Acknowledge strengths and limitations of the research relevant to accurate interpretation (e.g., internal validity)                        | Page 15, lines 352–359                  |
| <b>Other</b>      | 17   | State any relevant relationships (e.g., financial, technical, or material support)                                                         | Funding Sources Section                 |
|                   | 18   | Identify any publicly registered or published protocol (explaining any deviations)                                                         | N/A                                     |

<sup>a</sup> Adapted from the 2010 CONSORT (CONsolidated Standards Of Reporting Trials) checklist for reporting randomized controlled trials and can be used in conjunction with the associated paper that expands on each item.

<sup>b</sup> Items 7 (Interventions) and 10 (Blinding) are relevant for experimental research, including single-/double-blind contrasts of nutritional supplements.
